# Supplementary material
Source: PubMed Central journal article supplement (PMC9578327)
Supplement: mmc1.pdf [file mmc1.pdf]

## Supplemental information

### Virological characteristics of the SARS-CoV-2

#### Omicron BA.2.75 variant

Akatsuki Saito, Tomokazu Tamura, Jiri Zahradnik, Sayaka Deguchi, Koshiro Tabata, Yuki Anraku, Izumi Kimura, Jumpei Ito, Daichi Yamasoba, Hesham Nasser, Mako Toyoda, Kayoko Nagata, Keiya Uriu, Yusuke Kosugi, Shigeru Fujita, Maya Shofa, MST Monira Begum, Ryo Shimizu, Yoshitaka Oda, Rigel Suzuki, Hayato Ito, Naganori Nao, Lei Wang, Masumi Tsuda, Kumiko Yoshimatsu, Jin Kuramochi, Shunsuke Kita, Kaori Sasaki-Tabata, Hideo Fukuhara, Katsumi Maenaka, Yuki Yamamoto, Tetsuharu Nagamoto, Hiroyuki Asakura, Mami Nagashima, Kenji Sadamasu, Kazuhisa Yoshimura, Takamasa Ueno, Gideon Schreiber, Akifumi Takaori-Kondo, The Genotype to Phenotype Japan (G2P-Japan) Consortium, Kotaro Shirakawa, Hirofumi Sawa, Takashi Irie, Takao Hashiguchi, Kazuo Takayama, Keita Matsuno, Shinya Tanaka, Terumasa Ikeda, Takasuke Fukuhara, and Kei Sato

## **Supplementary Information**

### **Virological characteristics of the SARS-CoV-2 Omicron BA.2.75 variant**

Akatsuki Saito, Tomokazu Tamura, Jiri Zahradnik, Sayaka Deguchi, Koshiro Tabata, Yuki Anraku, Izumi Kimura, Jumpei Ito, Daichi Yamasoba, Hesham Nasser, Mako Toyoda, Kayoko Nagata, Keiya Uriu, Yusuke Kosugi, Shigeru Fujita, Maya Shofa, MST Monira Begum, Ryo Shimizu, Yoshitaka Oda, Rigel Suzuki, Hayato Ito, Naganori Nao, Lei Wang, Masumi Tsuda, Kumiko Yoshimatsu, Jin Kuramochi, Shunsuke Kita, Kaori Sasaki-Tabata, Hideo Fukuhara, Katsumi Maenaka, Yuki Yamamoto, Tetsuharu Nagamoto, Hiroyuki Asakura, Mami Nagashima, Kenji Sadamasu, Kazuhisa Yoshimura, Takamasa Ueno, Gideon Schreiber, Akifumi Takaori-Kondo, The Genotype to Phenotype Japan (G2P-Japan) Consortium, Kotaro Shirakawa, Hirofumi Sawa, Takashi Irie, Takao Hashiguchi, Kazuo Takayama, Keita Matsuno, Shinya Tanaka, Terumasa Ikeda, Takasuke Fukuhara, Kei Sato

Supplementary Figures S1-S5

Supplementary Tables S1-S6

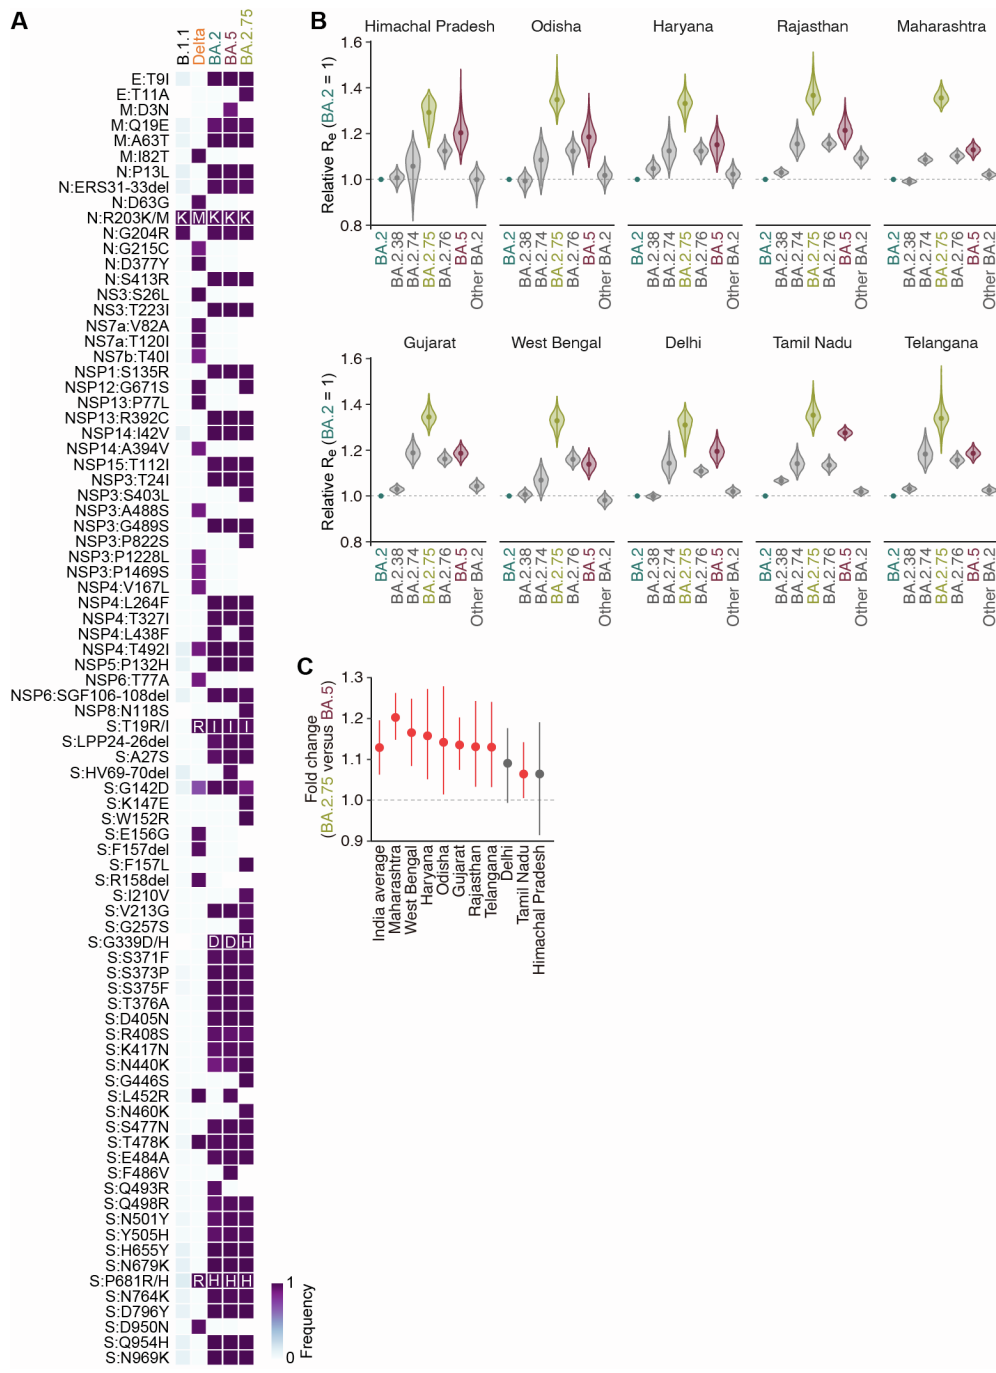

**Figure S1. Epidemic dynamics of BA.2.75 in India, related to Figure 1**

(A) Amino acid differences in B.1.1, Delta, BA.2, BA.5 and BA.2.75 compared to the SARS-CoV-2 A lineage. Heatmap color indicates the frequency of amino acid mutations.

(B) Estimated relative  $R_e$  of each viral lineage, assuming a fixed generation time of 2.1 days. The  $R_e$  value of BA.2 is set at 1. The posterior (violin), posterior mean (dot), and 95% CI (line) are shown. The  $R_e$  values for the respective Indian states are shown. The dynamics of the top seven predominant lineages in India were estimated. BA.5 sublineages are summarized as “BA.5”, and

nonpredominant BA.2 sublineages are summarized as “other BA.2”. The raw data are summarized in **Table S1**.

**(C)** Fold change in  $R_e$  values between BA.2.75 and BA.5. The posterior mean (dot) and 95% CI (line) are shown. Red indicates that the 95% CI does not overlap with the value of 1.

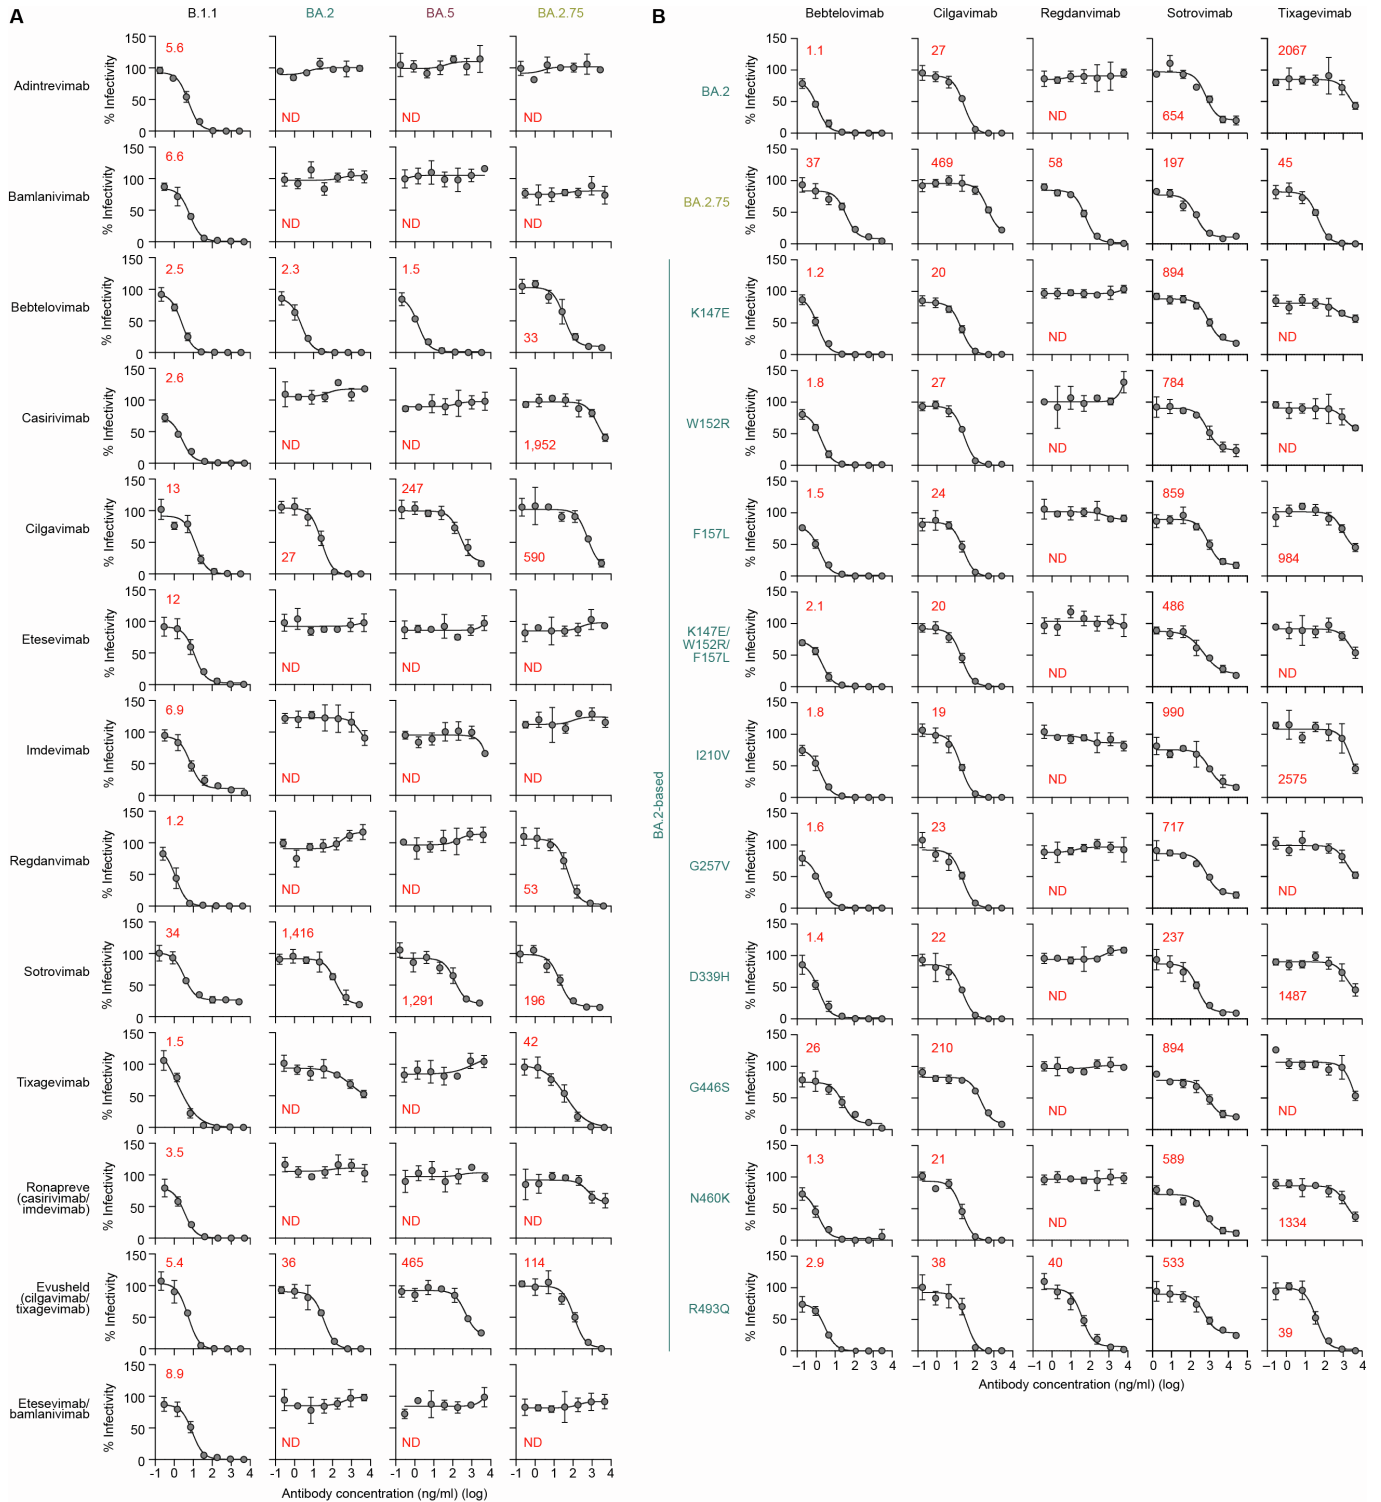

**Figure S2. Representative neutralization curves, related to Table 2**

A neutralization assay was performed using pseudoviruses harboring the SARS-CoV-2 S proteins of BA.2 and BA.5 and BA.2.75, the D614G-harboring B.1.1 lineage virus (B.1.1), and the BA.2 derivatives.

(A) Neutralization assay using pseudoviruses harboring the SARS-CoV-2 S proteins of BA.2, BA.5 and BA.2.75, the D614G-harboring B.1.1 lineage virus (B.1.1) with ten therapeutic monoclonal antibodies (adintrevimab, bamlanivimab, bebtelovimab, casirivimab, cilgavimab, etesevimab, imdevimab, regdanvimab, sotrovimab and tixagevimab) and three antibody cocktails [Ronapreve (casirivimab+imdevimab), Evusheld (cilgavimab+tixagevimab), and etesevimab+bamlanivimab]. A representative dataset is shown. The 50% inhibitory concentration (IC<sub>50</sub>) value of each assay is summarized in **Table 1**.

(B) Neutralization assay using pseudoviruses harboring the SARS-CoV-2 S proteins of BA.2, BA.2.75, and the BA.2 derivatives with five therapeutic monoclonal antibodies (bebtelovimab, cilgavimab, regdanvimab, sotrovimab and tixagevimab). A representative dataset is shown. The IC<sub>50</sub> value of each assay is summarized in **Table S3**.

The assay of each antibody was performed in triplicate at each concentration to determine the IC<sub>50</sub> (ng/ml), and the assay was independently repeated four times. Representative neutralization curves of a neutralization assay are shown. The red numbers in the panels indicate the IC<sub>50</sub> value. ND, not determined.

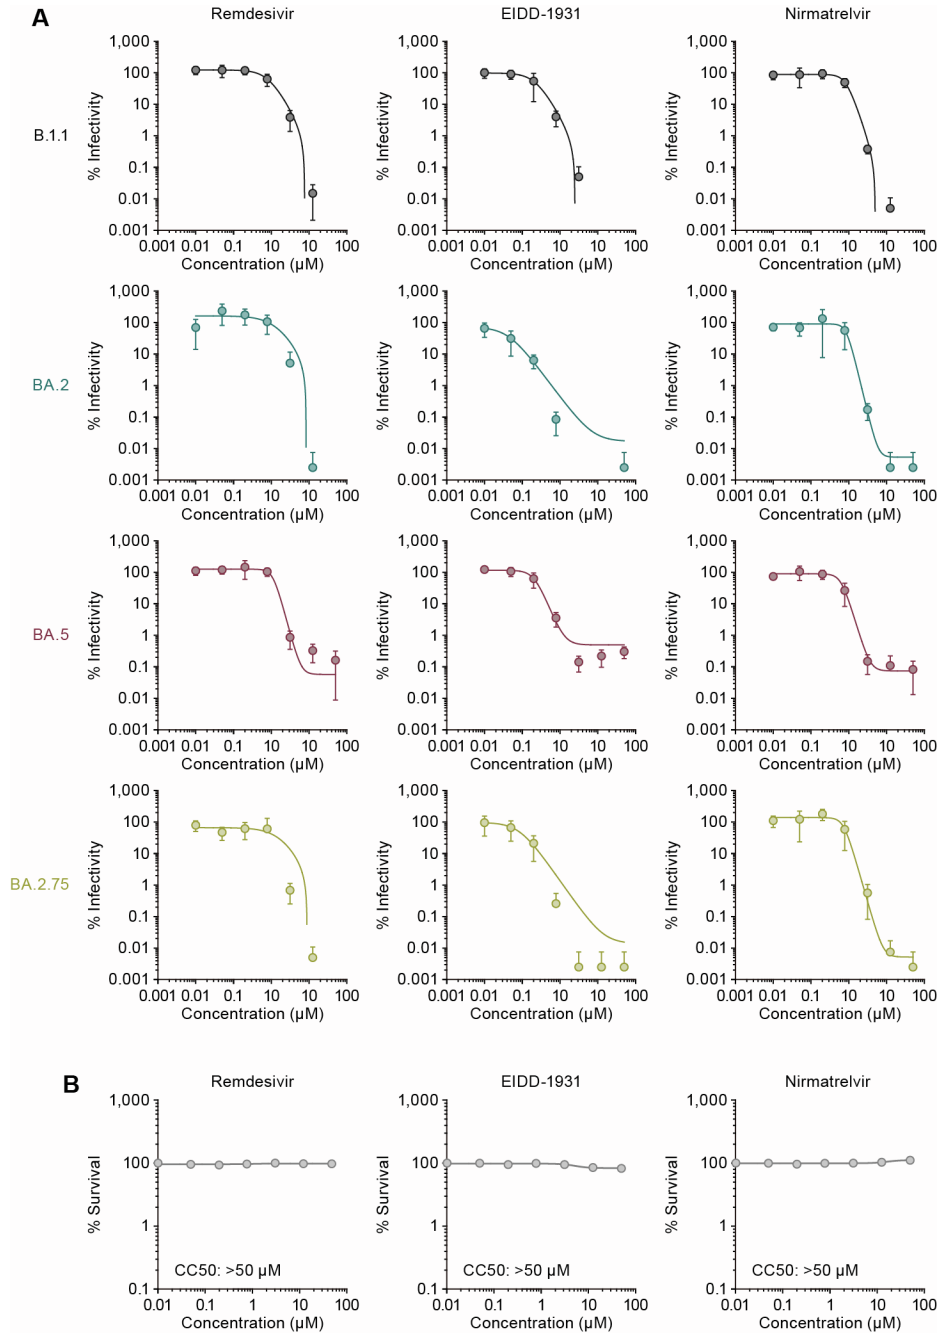

**Figure S3. Effects of antiviral drugs in AOs, related to Table 2**

**(A)** Antiviral effects of the three drugs in AO culture. The assay of each antiviral drug was performed in quadruplicate, and the 50% effective concentration ( $EC_{50}$ ) was calculated. The data are summarized in **Table 2**.

**(B)** Cytotoxic effects of the three drugs in AO culture. The assay of each antiviral drug was performed in quadruplicate, and the 50% cytotoxic concentration ( $CC_{50}$ ) was calculated. The  $CC_{50}$  values are indicated in the panels.

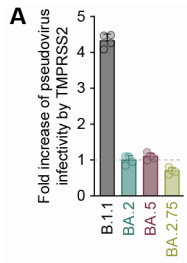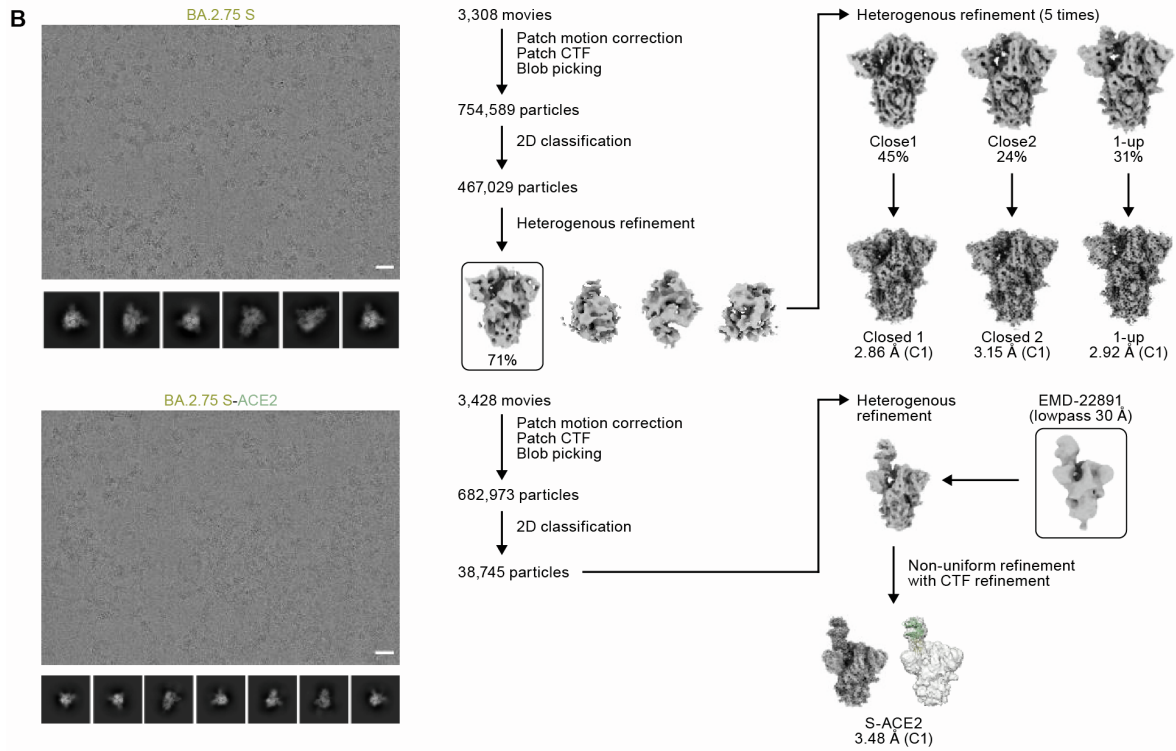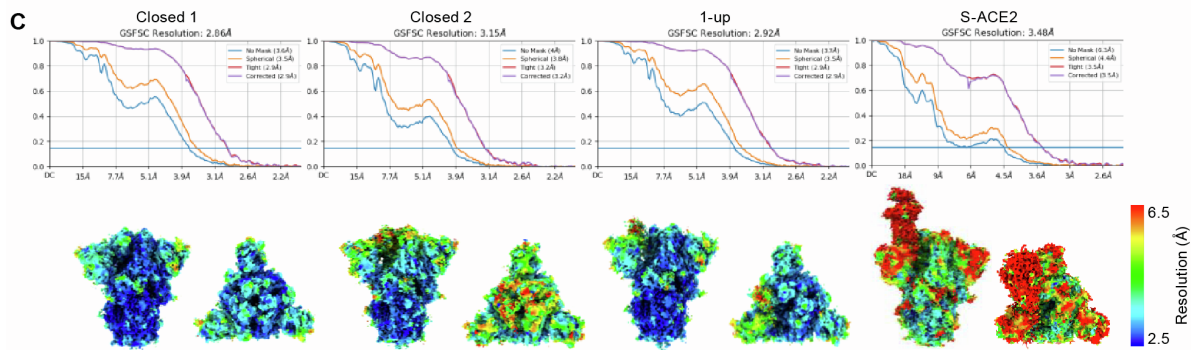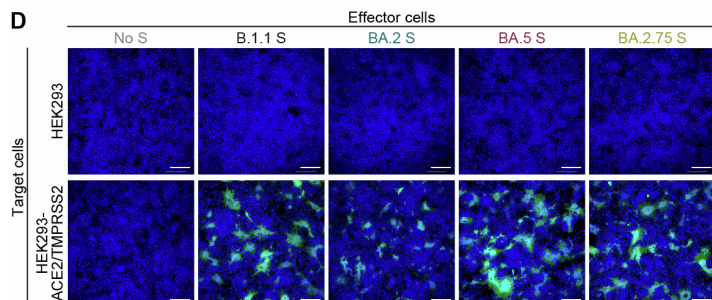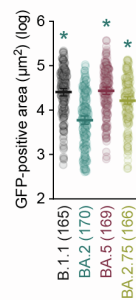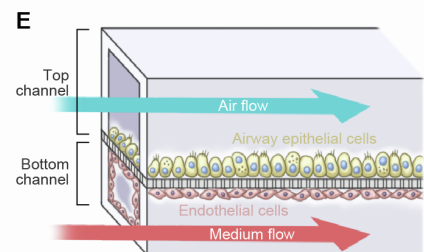



**Figure S4. Virological features of BA.2.75 *in vitro* and the cryo-EM data of SARS-CoV-2 BA.2.75 S, related to Figures 3 and 4**

(A) Fold increase in pseudovirus infectivity based on TMPRSS2 expression. Assays were performed in quadruplicate, and the presented data are expressed as the average  $\pm$  SD. Each dot indicates the result of an individual replicate.

(B and C) Cryo-EM. (B) (Left) Representative micrograph and 2D classes showing spike-like images. Scale bars, 20 nm (Right) The cryo-EM data processing flowchart for BA.2.75 S and BA.2.75 S-ACE2. (C) Global resolution assessment of the S ectodomain by gold-standard Fourier shell correlation (FSC) curves at the 0.143 criteria. Local resolution is colored blue to red (2.5–6.5 Å).

(D) Coculture of S-expressing cells with HEK293-ACE2/TMPRSS2 cells. Left, representative images of S-expressing cells cocultured with HEK293 cells (top) or HEK293-ACE2/TMPRSS2 cells (bottom). Nuclei were stained with Hoechst 33342 (blue). Right, size distribution of syncytia (green). The numbers in parentheses indicate the numbers of GFP-positive syncytia counted. Each dot indicates the result of an individual replicate. Statistically significant differences between BA.2 and the other variants (\*,  $P < 0.05$ ) were determined by two-sided Mann–Whitney  $U$  tests. Scale bars, 200  $\mu$ m.

(E) A scheme of the airway-on-a-chip system.

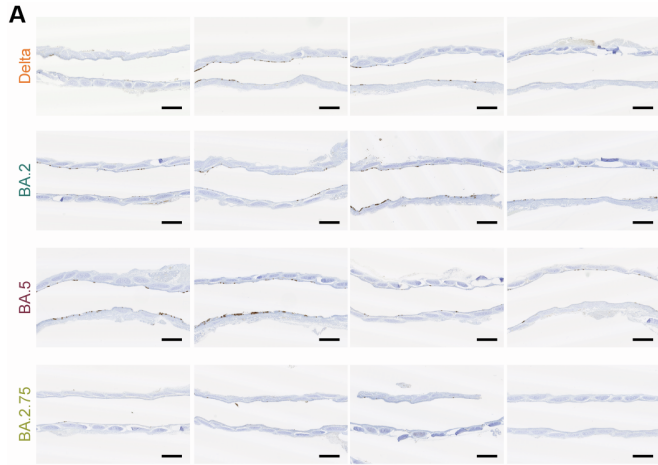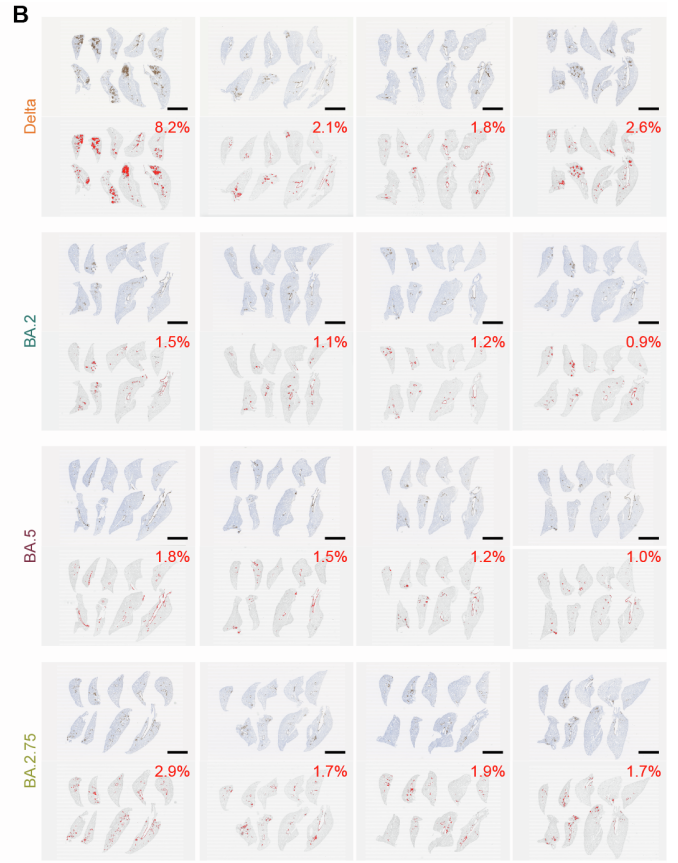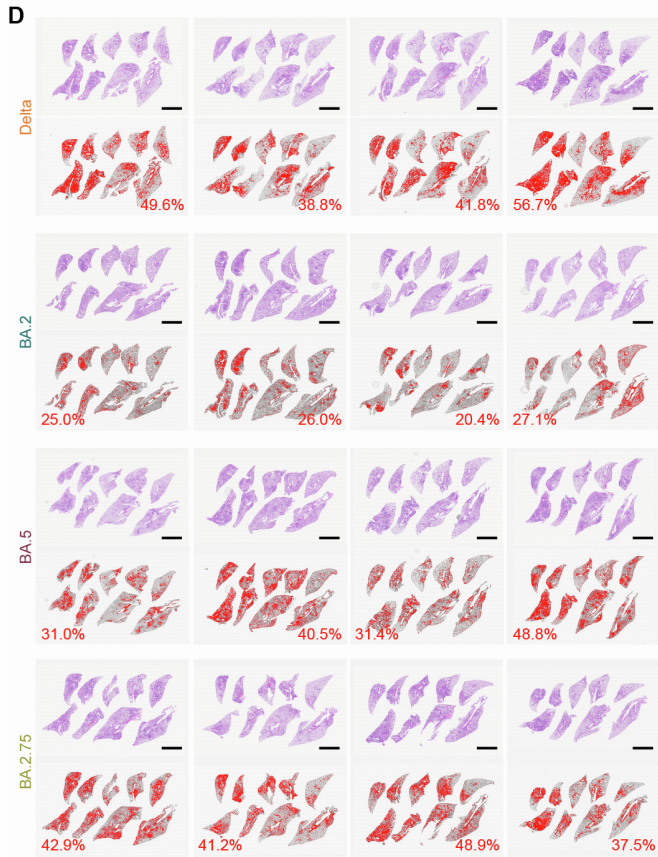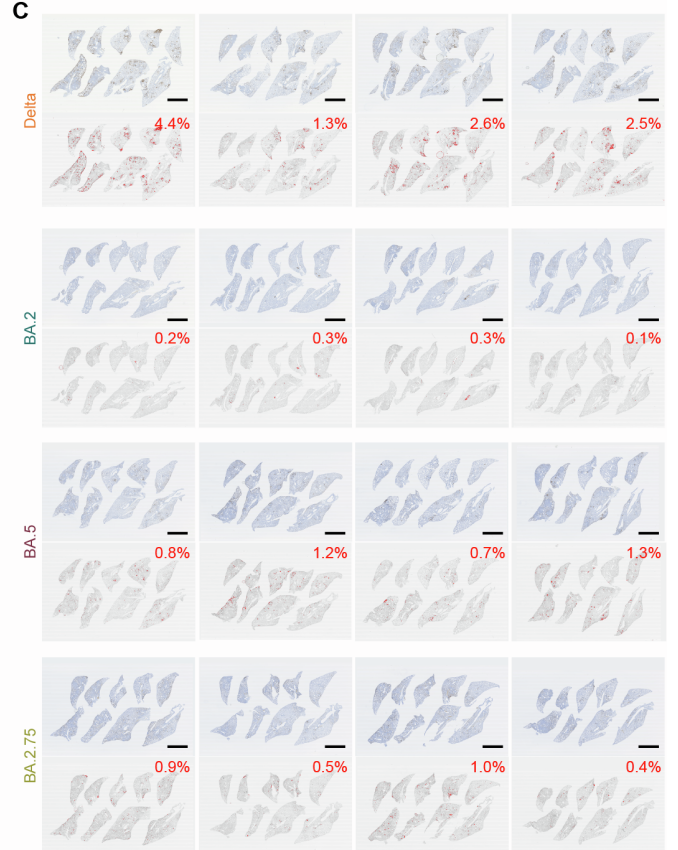

**Figure S5. Histological observations in infected hamsters, related to Figure 5**

(A) IHC of the viral N protein in the middle portion of the tracheas of all infected hamsters at 2 d.p.i (4 hamsters per infection group). Each panel shows a representative result from an individual infected hamster.

(B and C) IHC of the SARS-CoV-2 N protein in the lungs of infected hamsters at 2 d.p.i (B) and 5 d.p.i (C) (4 hamsters per infection group). In each panel, IHC staining (top) and the digitalized N-positive area (bottom, indicated in red) are shown. The red numbers in the bottom panels indicate the percentage of the N-positive area. Summarized data are shown in **Figure 5E**.

(D) Type II pneumocytes in the lungs of infected hamsters (4 hamsters per infection group). H&E staining (top) and the digitalized inflammatory area with type II pneumocytes (bottom, indicated in red) are shown. The red numbers in the bottom panels indicate the percentage of inflammatory area with type II pneumocytes. Summarized data are shown in **Figure 5H**.

In **A–C**, N-positive cells are shown in brown.

Scale bars, 1 mm (A); 5 mm (B–D).

**Table S1. Estimated relative Re values of viral lineages in India, related to Figure 1**

| Region           | PANGO lineage | Posterior mean | Posterior 2.5 percentile | Posterior 97.5 percentile | R-hat value | Effective sampling size (ESS_bulk) | Effective sampling size (ESS_tail) |
|------------------|---------------|----------------|--------------------------|---------------------------|-------------|------------------------------------|------------------------------------|
| Average in India | BA.2.38       | 1.014          | 0.980                    | 1.047                     | 1.001       | 7494                               | 4609                               |
| Average in India | BA.2.74       | 1.114          | 1.046                    | 1.181                     | 1.001       | 6997                               | 5146                               |
| Average in India | BA.2.75       | 1.325          | 1.260                    | 1.386                     | 1.001       | 4687                               | 5344                               |
| Average in India | BA.2.76       | 1.126          | 1.088                    | 1.163                     | 1.001       | 7073                               | 5603                               |
| Average in India | BA.5          | 1.175          | 1.123                    | 1.229                     | 1.000       | 6885                               | 5935                               |
| Average in India | other_BA.2    | 1.012          | 0.988                    | 1.034                     | 1.000       | 5769                               | 4540                               |
| Delhi            | BA.2.38       | 0.996          | 0.981                    | 1.011                     | 1.000       | 6369                               | 5656                               |
| Delhi            | BA.2.74       | 1.143          | 1.067                    | 1.242                     | 1.001       | 7747                               | 5090                               |
| Delhi            | BA.2.75       | 1.289          | 1.190                    | 1.373                     | 1.001       | 3139                               | 5654                               |
| Delhi            | BA.2.76       | 1.104          | 1.083                    | 1.126                     | 1.000       | 6791                               | 5237                               |
| Delhi            | BA.5          | 1.192          | 1.131                    | 1.262                     | 1.000       | 7912                               | 5379                               |
| Delhi            | other_BA.2    | 1.016          | 0.997                    | 1.036                     | 1.000       | 6711                               | 6376                               |
| Gujarat          | BA.2.38       | 1.026          | 1.006                    | 1.048                     | 1.000       | 4749                               | 6121                               |
| Gujarat          | BA.2.74       | 1.189          | 1.134                    | 1.252                     | 1.000       | 7025                               | 5472                               |
| Gujarat          | BA.2.75       | 1.342          | 1.276                    | 1.417                     | 1.000       | 6187                               | 5479                               |
| Gujarat          | BA.2.76       | 1.160          | 1.129                    | 1.195                     | 1.001       | 4956                               | 5585                               |
| Gujarat          | BA.5          | 1.183          | 1.142                    | 1.227                     | 1.000       | 6536                               | 5581                               |
| Gujarat          | other_BA.2    | 1.037          | 1.011                    | 1.067                     | 1.001       | 3976                               | 6060                               |
| Haryana          | BA.2.38       | 1.047          | 1.007                    | 1.090                     | 1.001       | 6768                               | 4498                               |
| Haryana          | BA.2.74       | 1.119          | 1.026                    | 1.228                     | 1.001       | 6173                               | 4544                               |
| Haryana          | BA.2.75       | 1.317          | 1.222                    | 1.410                     | 1.000       | 5500                               | 5097                               |
| Haryana          | BA.2.76       | 1.116          | 1.068                    | 1.163                     | 1.000       | 6834                               | 5939                               |
| Haryana          | BA.5          | 1.141          | 1.052                    | 1.227                     | 1.000       | 6620                               | 5776                               |
| Haryana          | other_BA.2    | 1.015          | 0.974                    | 1.059                     | 1.002       | 6977                               | 4660                               |
| Himachal Pradesh | BA.2.38       | 0.999          | 0.947                    | 1.046                     | 1.000       | 5939                               | 5138                               |
| Himachal Pradesh | BA.2.74       | 1.032          | 0.869                    | 1.165                     | 1.001       | 4892                               | 4578                               |
| Himachal Pradesh | BA.2.75       | 1.265          | 1.155                    | 1.362                     | 1.001       | 2204                               | 5090                               |
| Himachal Pradesh | BA.2.76       | 1.112          | 1.049                    | 1.174                     | 1.000       | 6078                               | 5973                               |
| Himachal Pradesh | BA.5          | 1.204          | 1.090                    | 1.376                     | 1.000       | 5117                               | 3189                               |
| Himachal Pradesh | other_BA.2    | 0.996          | 0.920                    | 1.042                     | 1.001       | 4613                               | 3718                               |
| Maharashtra      | BA.2.38       | 0.980          | 0.964                    | 0.996                     | 1.001       | 4975                               | 5164                               |
| Maharashtra      | BA.2.74       | 1.070          | 1.045                    | 1.095                     | 1.002       | 5661                               | 4211                               |
| Maharashtra      | BA.2.75       | 1.374          | 1.315                    | 1.438                     | 1.001       | 2884                               | 3583                               |
| Maharashtra      | BA.2.76       | 1.074          | 1.045                    | 1.104                     | 1.001       | 5863                               | 5574                               |
| Maharashtra      | BA.5          | 1.124          | 1.084                    | 1.165                     | 1.000       | 6480                               | 5592                               |
| Maharashtra      | other_BA.2    | 1.008          | 0.988                    | 1.028                     | 1.000       | 5377                               | 6103                               |
| Odisha           | BA.2.38       | 0.967          | 0.897                    | 1.024                     | 1.000       | 6823                               | 5270                               |
| Odisha           | BA.2.74       | 1.072          | 0.961                    | 1.183                     | 1.001       | 6126                               | 5321                               |
| Odisha           | BA.2.75       | 1.330          | 1.229                    | 1.450                     | 1.002       | 5748                               | 4262                               |

|             |            |       |       |       |       |      |      |
|-------------|------------|-------|-------|-------|-------|------|------|
| Odisha      | BA.2.76    | 1.111 | 1.026 | 1.192 | 1.000 | 6253 | 5024 |
| Odisha      | BA.5       | 1.164 | 1.060 | 1.275 | 1.001 | 6784 | 5692 |
| Odisha      | other_BA.2 | 1.007 | 0.954 | 1.055 | 1.000 | 6286 | 4461 |
| Tamil Nadu  | BA.2.38    | 1.070 | 1.055 | 1.085 | 1.000 | 7489 | 6863 |
| Tamil Nadu  | BA.2.74    | 1.145 | 1.084 | 1.214 | 1.000 | 7918 | 5399 |
| Tamil Nadu  | BA.2.75    | 1.356 | 1.274 | 1.468 | 1.001 | 4178 | 3730 |
| Tamil Nadu  | BA.2.76    | 1.135 | 1.100 | 1.173 | 1.000 | 7163 | 6076 |
| Tamil Nadu  | BA.5       | 1.278 | 1.253 | 1.304 | 1.001 | 7469 | 6402 |
| Tamil Nadu  | other_BA.2 | 1.018 | 1.004 | 1.034 | 1.001 | 6446 | 4780 |
| Telangana   | BA.2.38    | 1.031 | 1.014 | 1.049 | 1.000 | 5771 | 5813 |
| Telangana   | BA.2.74    | 1.187 | 1.117 | 1.273 | 1.000 | 6569 | 4791 |
| Telangana   | BA.2.75    | 1.332 | 1.213 | 1.476 | 1.002 | 5857 | 3985 |
| Telangana   | BA.2.76    | 1.158 | 1.126 | 1.192 | 1.001 | 6709 | 6026 |
| Telangana   | BA.5       | 1.185 | 1.151 | 1.220 | 1.001 | 6817 | 5522 |
| Telangana   | other_BA.2 | 1.022 | 1.005 | 1.039 | 1.001 | 5654 | 5842 |
| West Bengal | BA.2.38    | 1.011 | 0.986 | 1.036 | 1.000 | 3768 | 5238 |
| West Bengal | BA.2.74    | 1.066 | 0.999 | 1.139 | 1.000 | 5677 | 5609 |
| West Bengal | BA.2.75    | 1.320 | 1.235 | 1.402 | 1.000 | 5705 | 4714 |
| West Bengal | BA.2.76    | 1.165 | 1.125 | 1.208 | 1.000 | 4894 | 5535 |
| West Bengal | BA.5       | 1.139 | 1.088 | 1.191 | 1.000 | 5542 | 6235 |
| West Bengal | other_BA.2 | 0.982 | 0.950 | 1.014 | 1.000 | 2503 | 2162 |

Information on the averaged Re value in India and Re values in individual states are summarized.

**Table S2. Human sera used in this study, related to Figure 2**

| Vaccine  | Donor ID | Sex    | Age | Sampling date |                   |            | Sampling date     | Sampling date     | Prior infection? |
|----------|----------|--------|-----|---------------|-------------------|------------|-------------------|-------------------|------------------|
|          |          |        |     | 2nd vac       | 1 mo after 2-dose | 3rd vac    | 1 mo after 3-dose | 4 mo after 3-dose |                  |
| BNT162b2 | 5        | Female | 34  | 2021-04-30    | 2021-05-27        | 2022-01-22 | 2022-02-24        | 2022-05-13        | No               |
| BNT162b2 | 27       | Male   | 41  | 2021-04-27    | 2021-05-25        | 2022-01-22 | 2022-02-24        | 2022-05-13        | No               |
| BNT162b2 | 28       | Female | 42  | 2021-04-28    | 2021-05-26        | 2022-01-22 | 2022-03-16        | 2022-05-13        | No               |
| BNT162b2 | 36       | Male   | 34  | 2021-04-27    | 2021-05-27        | 2022-01-25 | 2022-02-25        | 2022-05-19        | No               |
| BNT162b2 | 38       | Female | 24  | 2021-04-27    | 2021-05-26        | 2022-01-26 | 2022-02-18        | 2022-05-19        | No               |
| BNT162b2 | 46       | Female | 42  | 2021-04-27    | 2021-05-25        | 2021-12-26 | 2022-02-14        | 2022-05-18        | No               |
| BNT162b2 | 55       | Female | 45  | 2021-04-30    | 2021-05-28        | 2022-01-28 | 2022-02-18        | 2022-05-19        | No               |
| BNT162b2 | 61       | Female | 48  | 2021-06-04    | 2021-07-02        | 2022-01-29 | 2022-02-14        | 2022-05-17        | No               |
| BNT162b2 | 69       | Male   | 42  | 2021-07-17    | 2021-08-12        | 2022-01-28 | 2022-02-22        | 2022-05-19        | No               |
| BNT162b2 | 71       | Male   | 34  | 2021-04-08    | 2021-05-06        | 2021-12-28 | 2022-01-21        | 2022-05-13        | No               |
| BNT162b2 | 87       | Male   | 34  | 2021-06-02    | 2021-06-30        | 2022-01-26 | 2022-02-16        | 2022-05-19        | No               |
| BNT162b2 | 89       | Male   | 45  | 2021-06-04    | 2021-06-29        | 2022-01-24 | 2022-02-15        | 2022-05-17        | No               |
| BNT162b2 | 97       | Female | 43  | 2021-06-04    | 2021-07-02        | 2022-01-26 | 2022-02-16        | 2022-05-18        | No               |
| BNT162b2 | 100      | Male   | 32  | 2021-06-08    | 2021-07-07        | 2022-01-22 | 2022-02-17        | 2022-05-17        | No               |
| BNT162b2 | 102      | Male   | 30  | 2021-05-31    | 2021-06-28        | 2022-01-22 | 2022-02-21        | 2022-05-17        | No               |

  

| Vaccine            | Donor ID | Sex    | Age | Sampling date |                   |            | Sampling date     | Sampling date     | 4th vac    | Sampling date     | Prior infection? |
|--------------------|----------|--------|-----|---------------|-------------------|------------|-------------------|-------------------|------------|-------------------|------------------|
|                    |          |        |     | 2nd vac       | 1 mo after 2-dose | 3rd vac    | 1 mo after 3-dose | 4 mo after 3-dose |            | 1 mo after 4-dose |                  |
| BNT162b2/mRNA-1273 | 4        | Female | 43  | 2021-06-04    | 2021-07-01        | 2022-01-28 | 2022-02-24        | 2022-05-25        | 2022-08-01 | 2022-08-22        | No               |
| BNT162b2/mRNA-1273 | 8        | Female | 56  | 2021-06-04    | 2021-07-01        | 2022-01-28 | 2022-02-24        | 2022-05-20        | 2022-08-05 | 2022-08-26        | No               |
| BNT162b2/mRNA-1273 | 14       | Female | 43  | 2021-06-04    | 2021-07-01        | 2022-01-28 | 2022-02-18        | 2022-05-20        | 2022-08-05 | 2022-08-16        | No               |
| BNT162b2/mRNA-1273 | 28       | Female | 42  | 2021-04-28    | 2021-05-26        | 2022-01-22 | 2022-03-16        | 2022-05-13        | 2022-07-30 | 2022-08-23        | No               |
| BNT162b2/mRNA-1273 | 62       | Male   | 46  | 2021-06-10    | 2021-07-08        | 2022-01-28 | 2022-02-22        | 2022-05-20        | 2022-08-05 | 2022-08-26        | No               |
| BNT162b2/mRNA-1273 | 63       | Female | 49  | 2021-05-31    | 2021-06-28        | 2022-02-05 | 2022-03-01        | 2022-05-26        | 2022-08-02 | 2022-08-25        | No               |
| BNT162b2/mRNA-1273 | 64       | Female | 42  | 2021-05-31    | 2021-06-28        | 2022-02-03 | 2022-02-24        | 2022-05-25        | 2022-08-01 | 2022-08-25        | No               |
| BNT162b2/mRNA-1273 | 67       | Male   | 38  | 2021-06-01    | 2021-06-29        | 2022-02-01 | 2022-02-25        | 2022-05-25        | 2022-08-03 | 2022-08-24        | No               |
| BNT162b2/mRNA-1273 | 90       | Male   | 45  | 2021-06-02    | 2021-06-30        | 2022-01-25 | 2022-02-15        | 2022-05-18        | 2022-08-02 | 2022-08-24        | No               |
| BNT162b2/mRNA-1273 | 92       | Female | 30  | 2021-06-10    | 2021-07-08        | 2022-01-26 | 2022-02-15        | 2022-05-18        | 2022-08-04 | 2022-08-26        | No               |
| BNT162b2/mRNA-1273 | 94       | Male   | 36  | 2021-06-01    | 2021-06-29        | 2022-02-02 | 2022-02-25        | 2022-05-24        | 2022-08-05 | 2022-08-26        | No               |
| BNT162b2/mRNA-1273 | 97       | Female | 43  | 2021-06-04    | 2021-07-02        | 2022-01-26 | 2022-02-16        | 2022-05-18        | 2022-07-21 | 2022-08-19        | No               |
| BNT162b2/mRNA-1273 | 103      | Male   | 35  | 2021-04-07    | 2021-05-07        | 2022-01-25 | 2022-02-15        | 2022-05-18        | 2022-08-02 | 2022-08-26        | No               |
| BNT162b2/mRNA-1273 | 113      | Female | 32  | 2021-06-04    | 2021-07-02        | 2022-01-28 | 2022-02-18        | 2022-05-20        | 2022-08-02 | 2022-08-23        | No               |
| BNT162b2/mRNA-1273 | 122      | Female | 45  | 2021-06-11    | 2021-07-08        | 2022-02-16 | 2022-03-16        | 2022-06-07        | 2022-08-01 | 2022-08-22        | No               |



Table S2. Human sera used in this study, related to Figure 2 (continued)

| SARS-CoV-2 infected | Donor ID | Sex    | Age | Date of test | Sampling date | Prior infection? | Prior vaccination? | Vaccine           | Date of 1st vaccination  | Date of 2nd vaccination  | Date of 3rd vaccination   | Date of 4rd vaccination |
|---------------------|----------|--------|-----|--------------|---------------|------------------|--------------------|-------------------|--------------------------|--------------------------|---------------------------|-------------------------|
| BA.1                | P264     | Male   | 60  | 2022/01/03   | 2022/01/29    | No               | Yes                | BNT162b2          | 2021/08/27               | 2021/09/18               |                           |                         |
| BA.1                | P265     | Female | 57  | 2022/01/04   | 2022/01/28    | No               | Yes                | BNT162b2          | 2021/10/04               | 2021/10/25               |                           |                         |
| BA.1                | P274     | Female | 20  | 2022/01/15   | 2022/01/29    | No               | Yes                | mRNA-1273         | 2021/09/11               | 2021/10/09               |                           |                         |
| BA.1                | P276     | Male   | 44  | 2022/01/20   | 2022/01/30    | No               | Yes                | BNT162b2          | 2021/08/06               | 2021/08/22               |                           |                         |
| BA.1                | P279     | Male   | 61  | 2022/01/18   | 2022/02/05    | No               | Yes                | BNT162b2          | 2021/07/03               | 2021/07/24               |                           |                         |
| BA.1                | P282     | Male   | 56  | 2022/01/22   | 2022/02/06    | No               | Yes                | BNT162b2          | 2021/09/18               | 2021/10/12               |                           |                         |
| BA.1                | P285     | Female | 65  | 2022/01/23   | 2022/02/06    | No               | Yes                | BNT162b2          | 2022/01/07               | 2022/01/28               |                           |                         |
| BA.1                | P295     | Female | 41  | 2022/01/25   | 2022/02/06    | No               | Yes                | BNT162b2          | 2021/08/07               | 2021/08/28               |                           |                         |
| BA.1                | P288     | Female | 76  | 2022/01/24   | 2022/02/07    | No               | Yes                | BNT162b2          | 2021/06/29               | 2021/07/20               |                           |                         |
| BA.1                | P289     | Female | 51  | 2022/01/24   | 2022/02/07    | No               | Yes                | BNT162b2          | 2021/08/02               | 2021/08/23               |                           |                         |
| BA.1                | P290     | Male   | 53  | 2022/01/25   | 2022/02/07    | No               | Yes                | BNT162b2          | 2021/09/02               | 2021/09/30               |                           |                         |
| BA.1                | 2651     | Male   | 71  | NA           | 2022/02/14    | No               | Yes                | BNT162b2          | 2021/06/14               | 2021/07/12               |                           |                         |
| BA.1                | 1880     | Female | 25  | 2022/01/07   | 2022/02/03    | No               | Yes                | BNT162b2          | 2021/09/09               | 2021/09/30               |                           |                         |
| BA.1                | 2187     | Male   | 32  | 2022/01/20   | 2022/02/05    | No               | Yes                | mRNA-1273         | 2021/07/09               | 2021/08/06               |                           |                         |
| BA.1                | 2137     | Female | 32  | 2022/01/19   | 2022/02/05    | No               | Yes                | mRNA-1273         | 2021/07/09               | 2021/08/06               |                           |                         |
| BA.1                | 2550     | Female | 24  | 2022/01/25   | 2022/02/05    | No               | Yes                | BNT162b2          | 2021/10/12               | 2021/11/02               |                           |                         |
| BA.2                | P378     | Male   | 43  | 2022/03/28   | 2022/04/10    | No               | Yes                | BNT162b2          | 2021/10/10               | 2021/10/31               |                           |                         |
| BA.2                | P398     | Male   | 48  | 2022/04/13   | 2022/04/30    | No               | Yes                | BNT162b2          | 2021/09/18               | 2021/10/09               | 2022/04/09                |                         |
| BA.2                | P407     | Male   | 29  | 2022/05/01   | 2022/05/12    | No               | Yes                | mRNA-1273         | 2021/09/13               | 2021/10/11               |                           |                         |
| BA.2                | P401     | Male   | 35  | 2022/04/22   | 2022/05/05    | No               | Yes                | BNT162b2          | 2021/09/09               | 2021/09/30               |                           |                         |
| BA.2                | P412     | Female | 82  | 2022/05/04   | 2022/05/26    | No               | Yes                | BNT162b2          | 2021/06/11               | 2021/07/09               |                           |                         |
| BA.2                | 6449     | Male   | 43  | 2022/04/03   | 2022/04/23    | No               | Yes                | BNT162b2          | 2021/08/13               | 2021/09/11               |                           |                         |
| BA.2                | 6355     | Male   | 50  | 2022/04/02   | 2022/04/20    | No               | Yes                | NA                | 2021/04/28               | 2021/05/19               | 2022/01/19                |                         |
| BA.2                | 6547     | Male   | 54  | 2022/04/06   | 2022/04/22    | No               | Yes                | BNT162b2          | 2021/08/25               | 2021/09/15               |                           |                         |
| BA.2                | 7951     | Female | 71  | 2022/04/25   | 2022/05/12    | No               | Yes                | Mix<br>(BNT162b2) | 2021/06/20<br>(BNT162b2) | 2021/07/16<br>(BNT162b2) | 2022/02/16<br>(mRNA-1273) |                         |
| BA.2                | 8645     | Female | 41  | 2022/05/07   | 2022/05/20    | No               | Yes                | BNT162b2          | 2021/05/23               | 2021/06/13               | 2022/01/20                |                         |
| BA.2                | 8682     | Female | 25  | 2022/05/08   | 2022/05/24    | No               | Yes                | BNT162b2          | 2021/09/03               | 2021/09/27               |                           |                         |
| BA.2                | 5949     | Male   | 24  | 2022/03/22   | 2022/05/22    | No               | Yes                | mRNA-1273         | 2021/08/05               | 2021/09/02               |                           |                         |
| BA.2                | 8463     | Male   | 84  | 2022/05/05   | 2022/05/23    | No               | Yes                | Mix<br>(BNT162b2) | 2021/05/27<br>(BNT162b2) | 2021/06/21<br>(BNT162b2) | 2022/02/22<br>(mRNA-1273) |                         |
| BA.2                | 8796     | Female | 34  | 2022/05/10   | 2022/06/05    | No               | Yes                | BNT162b2          | 2021/09/26               | 2021/10/17               |                           |                         |
| BA.5                | P427     | Female | 49  | 2022/07/06   | 2022/07/25    | No               | Yes                | NA                | 2021/07/30               | 2021/08/25               | 2022/03/18                |                         |
| BA.5                | P440     | Male   | 25  | 2022/07/24   | 2022/08/07    | No               | Yes                | BNT162b2          | 2021/11/24               | 2021/12/15               |                           |                         |
| BA.5                | P439     | Female | 73  | 2022/07/23   | 2022/08/08    | No               | Yes                | BNT162b2          | 2021/06/19               | 2021/07/20               | 2022/02/04<br>(mRNA-1273) |                         |
| BA.5                | P451     | Female | 55  | 2022/07/29   | 2022/8/12     | No               | Yes                | BNT162b2          | 2021/04/26               | 2021/05/20               | 2022/01/18                |                         |
| BA.5                | P456     | Male   | 44  | 2022/08/04   | 2022/08/14    | No               | Yes                | BNT162b2          | 2021/08/11               | 2021/09/01               | 2022/03/13<br>(mRNA-1273) |                         |
| BA.5                | P455     | Male   | 29  | 2022/08/03   | 2022/08/17    | No               | Yes                | mRNA-1273         | 2021/07/26               | 2021/08/27               | 2022/04/18                |                         |
| BA.5                | P464     | Male   | 63  | 2022/08/08   | 2022/08/19    | No               | Yes                | BNT162b2          | 2021/08/08               | 2021/08/29               | 2022/04/07<br>(mRNA-1273) |                         |
| BA.5                | 9341     | Male   | 56  | 2022/06/12   | 2022/06/30    | No               | Yes                | BNT162b2          | 2021/08/10               | 2021/08/31               | 2022/03/18                |                         |

|      |        |        |    |            |            |    |     |           |            |            |                           |                         |
|------|--------|--------|----|------------|------------|----|-----|-----------|------------|------------|---------------------------|-------------------------|
| BA.5 | 9584   | Male   | 55 | 2022/07/08 | 2022/07/25 | No | Yes | BNT162b2  | 2021/07/14 | 2021/08/05 | 2022/03/22                |                         |
| BA.5 | 11318  | Female | 51 | 2022/07/24 | 2022/08/05 | No | Yes | BNT162b2  | 2021/09/01 | 2021/09/22 | 2022/05/19<br>(mRNA-1273) |                         |
| BA.5 | 23S-08 | Male   | 25 | 2022/07/23 | 2022/08/08 | No | Yes | BNT162b2  | 2021/04/27 | 2021/05/18 | 2022/01/11                |                         |
| BA.5 | 11597  | Female | 41 | 2022/07/26 | 2022/08/08 | No | Yes | BNT162b2  | 2021/04/30 | 2021/05/21 | 2022/01/11                |                         |
| BA.5 | 10978  | Female | 46 | 2022/07/22 | 2022/08/11 | No | Yes | BNT162b2  | 2021/08/27 | 2021/09/17 | 2022/05/15                |                         |
| BA.5 | 10826  | Male   | 63 | 2022/07/21 | 2022/08/11 | No | Yes | BNT162b2  | 2021/07/27 | 2021/08/17 | 2022/03/04                | 2022/8/9<br>(mRNA-1273) |
| BA.5 | 11079  | Female | 65 | 2022/07/23 | 2022/08/11 | No | Yes | mRNA-1273 | 2021/07/08 | 2021/08/05 | 2022/03/17                |                         |
| BA.5 | 14847  | Female | 70 | 2022/08/13 | 2022/08/25 | No | Yes | BNT162b2  | 2021/07/13 | 2021/08/20 | 2022/03/08<br>(mRNA-1273) |                         |
| BA.5 | 13180  | Female | 63 | 2022/08/04 | 2022/08/25 | No | Yes | BNT162b2  | 2021/07/16 | 2021/08/06 | 2022/03/08<br>(mRNA-1273) |                         |
| BA.5 | 12912  | Male   | 64 | 2022/08/02 | 2022/08/25 | No | Yes | mRNA-1273 | 2021/09/02 | 2021/09/30 | 2021/04/01                |                         |
| BA.5 | 14956  | Female | 33 | 2022/08/13 | 2022/08/28 | No | Yes | BNT162b2  | 2021/09/06 | 2021/10/07 |                           |                         |
| BA.5 | 15707  | Female | 52 | 2022/08/16 | 2022/08/29 | No | Yes | BNT162b2  | 2021/08/07 | 2021/08/28 | 2022/04/03                |                         |

NA, not applicable.



**Table S3. IC50 values of five therapeutic monoclonal antibodies against BA.2.75 and BA.2 derivatives, related to Table 1**

|              | BA.2   | BA.2.75 | BA.2 K147E | BA.2 W152R | BA.2 F157L | 152R/F157L) | BA.2 I210V | BA.2 G257S | BA.2 D339H | BA.2 G446S | BA.2 N460K | BA.2 R493Q |
|--------------|--------|---------|------------|------------|------------|-------------|------------|------------|------------|------------|------------|------------|
| Bebtelovimab | 1.1    | 37.4    | 1.2        | 1.8        | 1.5        | 2.1         | 1.8        | 1.6        | 1.4        | 25.6       | 1.3        | 2.9        |
| Cilgavimab   | 26.7   | 468.5   | 19.7       | 27.1       | 24.4       | 20.1        | 18.6       | 22.5       | 22.3       | 210.2      | 21.1       | 38.0       |
| Regdanvimab  | >6175  | 57.9    | >6175      | >6175      | >6175      | >6175       | >6175      | >6175      | >6175      | >6175      | >6175      | 39.7       |
| Sotrovimab   | 653.8  | 196.6   | 893.6      | 783.9      | 858.8      | 485.9       | 990.3      | 716.5      | 236.5      | 894.0      | 589.4      | 533.3      |
| Tixgevimab   | 2067.0 | 44.9    | >4375      | >4375      | 983.9      | >4375       | 2575.0     | >4375      | 1487.0     | >4375      | 1334.0     | 38.6       |

The average 50% inhibitory concentration (IC50; ng/mL) ± 95% confidential interval is shown. Representative neutralization curves are shown in **Figure S2B**.

**Table S4. Statistics of the cryo-EM dataset, data processing and structure refinement, related to Figure 3**

|                                  | SARS-CoV-2 BA.2.75 spike                                                |           |           | SARS-CoV-2 BA.2.75 spike S RBD-ACE2                                     |
|----------------------------------|-------------------------------------------------------------------------|-----------|-----------|-------------------------------------------------------------------------|
| Structures                       | closed 1                                                                | closed 2  | 1-up      |                                                                         |
| EMDB ID                          | EMD-34221                                                               | EMD-34222 | EMD-34223 | EMD-34224                                                               |
| PDB ID                           | 8GS6                                                                    | -         | -         | -                                                                       |
| <b>Data collection</b>           |                                                                         |           |           |                                                                         |
| Microscope                       | Krios G4                                                                |           |           | Krios G4                                                                |
| Detector                         | Gatan Biocontinuum energy filter with Gatan K3 direct electron detector |           |           | Gatan Biocontinuum energy filter with Gatan K3 direct electron detector |
| Voltage (kV)                     | 300                                                                     |           |           | 300                                                                     |
| Nominal magnification            | 130,000                                                                 |           |           | 130,000                                                                 |
| Defocus range ( $\mu\text{m}$ )  | -0.8 to -1.8                                                            |           |           | -0.8 to -1.8                                                            |
| Physical pixel ( $\text{\AA}$ )  | 0.67                                                                    |           |           | 0.67                                                                    |
| Electron dose ( $e/\text{\AA}$ ) | 50                                                                      |           |           | 50                                                                      |
| Number of raw frames             | 50                                                                      |           |           | 50                                                                      |
| <b>Data processing</b>           |                                                                         |           |           |                                                                         |
| Extracted particles (n)          | 754589                                                                  |           |           | 682973                                                                  |
| Particles for final map (n)      | 139418                                                                  | 76153     | 96181     | 38745                                                                   |
| Symmetry imposed                 | C1                                                                      | C1        | C1        | C1                                                                      |
| Resolution                       | 2.86                                                                    | 3.15      | 2.92      | 3.48                                                                    |
| FSC threshold                    | 0.143                                                                   | 0.143     | 0.143     | 0.143                                                                   |
| <b>Model composition</b>         |                                                                         |           |           |                                                                         |
| Initial model used               | 7UB0                                                                    |           |           |                                                                         |
| Non-hydrogen atoms               | 24538                                                                   |           |           |                                                                         |
| Protein residues                 | 3058                                                                    |           |           |                                                                         |
| Ligands                          | NAG:41                                                                  |           |           |                                                                         |
| <b>R.m.s. deviations</b>         |                                                                         |           |           |                                                                         |
| Bond length ( $\text{\AA}$ )     | 0.004                                                                   |           |           |                                                                         |
| Bond angles ( $^\circ$ )         | 0.59                                                                    |           |           |                                                                         |
| <b>Validation</b>                |                                                                         |           |           |                                                                         |
| MolProbity score                 | 1.54                                                                    |           |           |                                                                         |
| Clash score                      | 6.1                                                                     |           |           |                                                                         |
| Rotamer outliers (%)             | 0                                                                       |           |           |                                                                         |
| <b>Ramachandran plot</b>         |                                                                         |           |           |                                                                         |
| Favored (%)                      | 95.64                                                                   |           |           |                                                                         |
| Allowed                          | 4.36                                                                    |           |           |                                                                         |
| Outliers                         | 0                                                                       |           |           |                                                                         |
| <b>Model vs. Data</b>            |                                                                         |           |           |                                                                         |
| CC (mask)                        | 0.84                                                                    |           |           |                                                                         |

**Table S5. Primers used for the construction of SARS-CoV-2 S expression plasmids, related to Figures 2 and 3**

| Primer name            | Sequence (5'-to-3')                                                                          |
|------------------------|----------------------------------------------------------------------------------------------|
| Omicron universal Fw   | cactatagggcggaattgggtaccatgtttggttctctggt                                                    |
| BA2 Rv                 | agctccaccgcggtggcgccgctcagggtgtagtcagttca                                                    |
| pC_S_BA2_147_152_157_R | cagactccattctggactgtgttctcgtgtagtagac                                                        |
| pC_S_BA2_147_152_157_F | caacaagtccagaatggagtctgagctgaggggtctactcc                                                    |
| pC_S_BA2_K147E_R       | ggactgtgttctcgtgtagtagac                                                                     |
| pC_S_BA2_K147E_F       | gttactaccacgagaacaacaagtcc                                                                   |
| pC_S_BA2_W152R_R       | ctcagactccattctggactgtgtgt                                                                   |
| pC_S_BA2_W152R_F       | aacaacaagtccagaatggagtctgag                                                                  |
| pC_S_BA2_F157L_R       | ggagtagaccctcagctcagactccat                                                                  |
| pC_S_BA2_F157L_F       | atggagtctgagctgaggggtctactcc                                                                 |
| pC_S_BA2_I210V_R       | cctgccaggtcactgggtgtgttt                                                                     |
| pC_S_BA2_I210V_F       | aaacacacaccagtgaacctgggcagg                                                                  |
| pC_S_BA2_G257S_R       | tcctgtgtccagctagaggaggagt                                                                    |
| pC_S_BA2_G257S_F       | gactcctcctctagctggacagcagga                                                                  |
| pC_S_BA2_D339H_R       | attgaacacctcgtgaaatggacacag                                                                  |
| pC_S_BA2_D339H_F       | ctgtgtccatttcacgaggtgttcaat                                                                  |
| pC_S_BA2_G446S_R       | ggtgtagtgcgctcacctgtctgtc                                                                    |
| pC_S_BA2_G446S_F       | gacagcaaggtgagcggcaactacaac                                                                  |
| pC_S_BA2_N460K_R       | aaatggttcagctgtcttctctgaa                                                                    |
| pC_S_BA2_N460K_F       | ttcaggaagagcaagctgaaaccattt                                                                  |
| pC-S_BA2_R493Q-F       | ttactttccactccaatcctatggctca                                                                 |
| pC-S_BA2_R493Q-R       | tgaagccataggattggagtggaaagtaa                                                                |
| BA2_G446S_R            | CCTGAACAGTCTGTAGAGGTAGTTGTAGTTGCCACTCACC<br>TTGCTGTCCAGTTTGTGG                               |
| BA2_D339H_F            | GTAGCGGAGGCGGAGGGTTCGGCTAGCCATCCAAACATC<br>ACCAACCTGTGCCCTTTTCATGAAGTTTTTAACGCCACCA<br>GG    |
| BA2_N460K_R            | CTCTGTGCTGATGTCCCTCTCAAATGGTTTCAGTTTGCTC<br>TTCCTGAACAGTCTGTAGAGG                            |
| BA2_R493Q_R            | GCCCACTCCATAGGTTGGACGGAAGCCATAGGACTGGAG<br>TGGAAAGTAACAGTTGAAGCCG                            |
| BA2_CON3_F             | GGCGGTAGCGGAGGCGGAGGGTTCGGCTAGCCATCCAAA<br>CATCACCACCTGTGCCCTTTTGATGAAGTTTTTAACGCC<br>ACCAGG |
| RBDO_CON3_F            | GGAGGCGGTAGCGGAGGCGGAGGGTTCGGCTAGCCATCC<br>TAATATCACCACCTGTGCCCTTTTGATGAAGTTTTTAACG          |
| BA275_N460N_F          | CTACAACCTACCTCTACAGACTGTTTCAGGAAGAGCAACCT<br>GAAACCATTTGAGAGGGACATCAG                        |
| ACE2_N90Q_F            | CACTTGCCCAAATGTATCCACTACAAGAAATTCAGGAACT<br>CACAGTCAAGCTTCAGCTGC                             |
